# Supplementary material for: Autologous regulatory T-cell transfer in refractory ulcerative colitis with concomitant primary sclerosing cholangitis
Source: HighWire-hosted journal article supplement (doi:10.1136/gutjnl-2022-327075), 2022-04-15
Supplement: gutjnl-2022-327075supp001_data_supplement.pdf [file gutjnl-2022-327075supp001_data_supplement.pdf]

## Supplemental Material

## Supplemental figure 1

1A

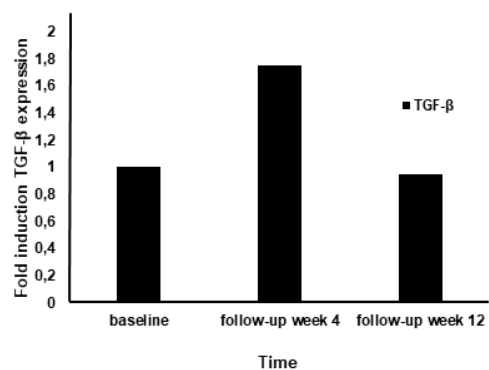

1B

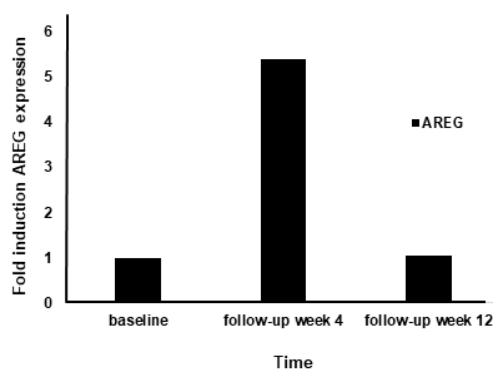

**Supplemental figure 1. Adoptive Treg transfer is associated with enhanced TGF- $\beta$  expression and tissue repair.** mRNA expression levels of TGF- $\beta$  (A) and amphiregulin (B) were measured by qRT-PCR and normalized to the housekeeping gene HPRT in gut biopsies derived before adoptive Treg transfer (baseline) and 4 weeks and 12 weeks after adoptive Treg transfer. TGF- $\beta$ , transforming growth factor beta; AREG, amphiregulin.

**Supplemental table 1** Lot-release of the Treg product intended for clinical use

| Parameter      |                                                           |          |                         | Specification |
|----------------|-----------------------------------------------------------|----------|-------------------------|---------------|
| Cell count     | Cell count alive/ml                                       | 8.44     | X 10 <sup>6</sup> /ml   | ≥ 5.0         |
| Vitality       | Cell count alive/dead                                     | 89.7     | %                       | ≥ 75          |
| Phenotype      | CD4 <sup>+</sup>                                          | 98.9     | %                       | ≥ 90          |
|                | CD25 <sup>+</sup>                                         | 85.1     | %                       | ≥ 80          |
|                | CD127 <sup>+</sup>                                        | 1.4      | %                       | ≤ 10          |
|                | CD4 <sup>+</sup> CD25 <sup>+</sup> CD127 <sup>low/-</sup> | 81.6     | %                       | ≥ 70          |
|                | CD8 <sup>+</sup>                                          | 0.0      | %                       | ≤ 0.5         |
|                | CD19 <sup>+</sup>                                         | 0.0      | %                       | ≤ 1.0         |
| Suppression    | CD56 <sup>+</sup>                                         | 0.0      | %                       | ≤ 1.0         |
|                | Tresp+Treg (1+1)                                          | 99.6     | %                       | ≥ 80          |
|                | Tresp+Treg (5+1)                                          | 96.7     | %                       | ≥ 60          |
|                | Tresp+Treg (10+1)                                         | 87.3     | %                       | ≥ 50          |
| Expander beads | Remaining bead count                                      | < 400    | n/100 x 10 <sup>6</sup> | < 1000        |
| Sterility      | Microbiological growth                                    | negative | -                       | negative      |
|                | Endotoxin                                                 | < 0.75   | IU/ml                   | < 5           |
|                | Mycoplasma DNA                                            | negative | -                       | negative      |

**Supplemental table 2**      **Previous ulcerative colitis related medications**

| <b>Previous therapies</b> | <b>Duration of treatment</b> | <b>Reason for discontinuation</b> |
|---------------------------|------------------------------|-----------------------------------|
| Azathioprine              | 2007-2016                    | Loss of response                  |
| Golimumab                 | 2017-2018                    | Severe skin allergic reactions    |
| Vedolizumab               | 2018-2019                    | Non-response                      |
| Ustekinumab               | 2019-2021                    | Non-response                      |

**Supplemental table 3**      **Concomitant medication during the study**

| <b>Concomitant therapies</b> | <b>Dose</b> |
|------------------------------|-------------|
| 5-aminosalicylic acid        | 4 g / day   |
| Ursodeoxycholic acid         | 1 g / day   |

**Supplemental table 4 Clinical markers during the study**

|                           | Baseline | Treg transfer | Follow-up week 2 | Follow-up week 4 | Follow-up week 8 | Follow-up week 12 |
|---------------------------|----------|---------------|------------------|------------------|------------------|-------------------|
| <b>Mayo Score SF</b>      | 2        | 3             | 3                | 2                | 2                | 1                 |
| <b>Mayo Score RB</b>      | 1        | 1             | 0                | 0                | 0                | 0                 |
| <b>PGA</b>                | 2        | 3             | 1                | 2                | 0                | 1                 |
| <b>Partial Mayo Score</b> | 5        | 7             | 4                | 4                | 2                | 2                 |

SF= Stool frequency; RB= Rectal bleeding; PGA= Physician Global Assessment

**Supplemental table 5**                      **Laboratory parameters**

| Parameter        | normal range          | baseline | Follow-up week 2 | Follow-up week 4 | Follow-up week 12 |
|------------------|-----------------------|----------|------------------|------------------|-------------------|
| Calprotectin     | 0 - 50 µg/g           | 5637.0   | 2325.6           | 2925.0           | 3029.9            |
| Leucocytes       | (4 - 11) x 10e3/µl    | 6.69     | 6.17             | 7.64             | 5.21              |
| Haemoglobin      | (11.8 - 15.5) g/dl    | 14.2     | 13.3             | 13.3             | 13.6              |
| Thrombocytes     | (160 - 400) x 10e3/µl | 411      | 392              | 392              | 347               |
| neutrophils      | %                     | 69.0     | 52.2             | 57.4             | 53.9              |
| eosinophils      |                       | 2.1      | 1.6              | 1.7              | 1.7               |
| basophils        |                       | 0.9      | 1.1              | 0.8              | 1.0               |
| lymphocytes      |                       | 18.4     | 32.1             | 29.2             | 29.4              |
| monocytes        |                       | 9.6      | 13.0             | 10.9             | 14.1              |
| potassium        | (3.6 - 4.8) mmol/l    | 4.3      | 4.0              | 4.1              | 4.3               |
| sodium           | (135 - 145) mmol/l    | 138      | 136              | 139              | 140               |
| creatin-kinase   | (< 170) U/l           | 39       | 103              | 26               | 35                |
| AST              | (< 35) U/l            | 176      | 91               | 63               | 158               |
| ALT              | (< 35) U/l            | 165      | 76               | 57               | 152               |
| LDH              | (< 250) U/l           | 177      | 102              | 110              | 167               |
| Gamma-GT         | (< 40) U/l            | 938      | 679              | 289              | 859               |
| alk. Phosphatase | (35 - 105) U/l        | 1089     | 811              | 490              | 1065              |
| Glucose          | (70 - 110) mg/dl      | 118      | 80               | 75               | 86                |
| Calcium          | (2.20 - 2.65) mmol/l  | 2.28     | 2.31             | 2.18             | 2.28              |
| urea             | (17 - 43) mg/dl       | 23       | 17               | 17               | 20                |
| Kreatinin        | (0.51 - 0.95) mg/dl   | 0.64     | 0.68             | 0.63             | 0.71              |
| Bilirubin total  | (< 1.1) mg/dl         | 1.8      | 1.5              | 1.1              | 1.5               |
| Magnesium        | (0.7 - 1.1) mmol/l    | 0.8      | 0.8              | 0.8              | 0.8               |
| Albumin          | (35 - 55) g/l         | 35.7     | 37.2             | 34.7             | 38.3              |
| CRP              | (< 5) mg/l            | 16.4     | 8.0              | 9.8              | 14.4              |
